# Supplementary material for: Structure and Glass Transition Temperature of Amorphous Dispersions of Model Pharmaceuticals with Nucleobases from Molecular Dynamics
Source: MDPI journal article supplement (doi:10.3390/pharmaceutics13081253), 2021-08-13
Supplement: s1 [file s1]

# Supplementary Materials: Structure and Glass Transition Temperature of Amorphous Dispersions of Model Pharmaceuticals with Nucleobases from Molecular Dynamics

Ctirad Červinka \* and Michal Fulem

**Table S1.** Non-bonded force field parameters for carbamazepin.

| Atom type        | $q_i / e$ | $\sigma / \text{\AA}$ | $\epsilon / \text{kcal}\cdot\text{mol}^{-1}$ |
|------------------|-----------|-----------------------|----------------------------------------------|
| CZ <sub>1</sub>  | -0.1469   | 3.800                 | 0.115                                        |
| HZC <sub>1</sub> | 0.0845    | 2.420                 | 0.030                                        |
| CZ <sub>2</sub>  | 0.0993    | 3.550                 | 0.070                                        |
| CZ <sub>3</sub>  | 0.2228    | 3.550                 | 0.070                                        |
| CZ <sub>4</sub>  | -0.1901   | 3.550                 | 0.070                                        |
| HZC <sub>4</sub> | 0.1164    | 2.420                 | 0.030                                        |
| CZ <sub>5</sub>  | -0.2418   | 3.550                 | 0.070                                        |
| HZC <sub>5</sub> | 0.1522    | 2.420                 | 0.030                                        |
| CZ <sub>6</sub>  | -0.0624   | 3.550                 | 0.070                                        |
| HZC <sub>6</sub> | 0.0843    | 2.420                 | 0.030                                        |
| CZ <sub>7</sub>  | -0.0874   | 3.550                 | 0.070                                        |
| HZC <sub>7</sub> | 0.0831    | 2.420                 | 0.030                                        |
| NZ <sub>1</sub>  | -0.2240   | 3.250                 | 0.170                                        |
| CZN              | 0.7340    | 3.750                 | 0.105                                        |
| OZ               | -0.5974   | 2.960                 | 0.210                                        |
| NZ <sub>2</sub>  | -0.7624   | 3.250                 | 0.170                                        |
| HZ <sub>2</sub>  | 0.3109    | 0.000                 | 0.000                                        |

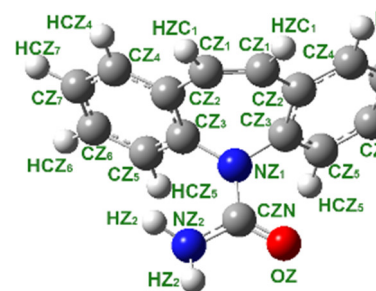

**Table S2.** Non-bonded force field parameters for ibuprofen.

| Atom type       | $q_i / e$ | $\sigma / \text{\AA}$ | $\epsilon / \text{kcal}\cdot\text{mol}^{-1}$ |
|-----------------|-----------|-----------------------|----------------------------------------------|
| CBA             | -0.1150   | 3.550                 | 0.070                                        |
| HBA             | 0.1150    | 2.420                 | 0.030                                        |
| CB <sub>1</sub> | 0.0550    | 3.500                 | 0.080                                        |
| HBC             | 0.0600    | 2.500                 | 0.080                                        |
| CB <sub>2</sub> | -0.0050   | 3.500                 | 0.080                                        |
| CB <sub>3</sub> | -0.1800   | 3.500                 | 0.080                                        |
| CB <sub>4</sub> | -0.0600   | 3.500                 | 0.080                                        |
| CB <sub>5</sub> | -0.1800   | 3.500                 | 0.080                                        |
| CBO             | 0.5200    | 3.750                 | 0.105                                        |
| OB              | -0.4400   | 2.960                 | 0.210                                        |
| OBH             | -0.5300   | 2.960                 | 0.210                                        |
| HB              | 0.4500    | 0.000                 | 0.000                                        |

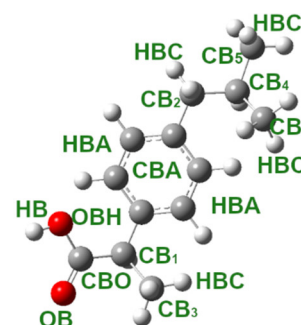

**Table S3.** Non-bonded force field parameters for indomethacin.

| Atom type       | $q_i / e$ | $\sigma / \text{\AA}$ | $\epsilon / \text{kcal}\cdot\text{mol}^{-1}$ |
|-----------------|-----------|-----------------------|----------------------------------------------|
| ND              | -0.2105   | 3.250                 | 0.170                                        |
| CD <sub>1</sub> | 0.1333    | 3.550                 | 0.070                                        |
| CD <sub>2</sub> | -0.1811   | 3.550                 | 0.070                                        |
| CD <sub>3</sub> | 0.0755    | 3.550                 | 0.070                                        |
| CD <sub>4</sub> | -0.3321   | 3.550                 | 0.070                                        |
| CD <sub>5</sub> | 0.3645    | 3.550                 | 0.070                                        |
| CD <sub>6</sub> | -0.3412   | 3.550                 | 0.070                                        |
| CD <sub>7</sub> | -0.1605   | 3.550                 | 0.070                                        |
| CD <sub>8</sub> | 0.0232    | 3.550                 | 0.070                                        |

|                   |         |       |       |
|-------------------|---------|-------|-------|
| CD <sub>9</sub>   | 0.7459  | 3.750 | 0.105 |
| CD <sub>10</sub>  | -0.2449 | 3.550 | 0.070 |
| CD <sub>11</sub>  | -0.0774 | 3.550 | 0.070 |
| CD <sub>12</sub>  | -0.0319 | 3.550 | 0.070 |
| CD <sub>13</sub>  | -0.0081 | 3.550 | 0.070 |
| CD <sub>14</sub>  | -0.3241 | 3.500 | 0.660 |
| CD <sub>15</sub>  | -0.0272 | 3.500 | 0.660 |
| CD <sub>16</sub>  | 0.7025  | 3.750 | 0.105 |
| CD <sub>17</sub>  | 0.0973  | 3.800 | 0.170 |
| ODE               | -0.3810 | 3.000 | 0.170 |
| OD <sub>1</sub>   | -0.5422 | 2.960 | 0.210 |
| ODH               | -0.6002 | 2.960 | 0.210 |
| HD                | 0.4666  | 0.000 | 0.000 |
| OD <sub>2</sub>   | -0.6049 | 2.960 | 0.210 |
| CID               | -0.0987 | 3.400 | 0.300 |
| HDC <sub>4</sub>  | 0.1821  | 2.420 | 0.030 |
| HDC <sub>6</sub>  | 0.1837  | 2.420 | 0.030 |
| HDC <sub>7</sub>  | 0.1816  | 2.420 | 0.030 |
| HDC <sub>11</sub> | 0.1223  | 2.420 | 0.030 |
| HDC <sub>12</sub> | 0.1184  | 2.420 | 0.030 |
| HDC <sub>14</sub> | 0.1242  | 2.500 | 0.030 |
| HDC <sub>15</sub> | 0.0604  | 2.500 | 0.030 |
| HDC <sub>17</sub> | 0.0481  | 2.500 | 0.030 |

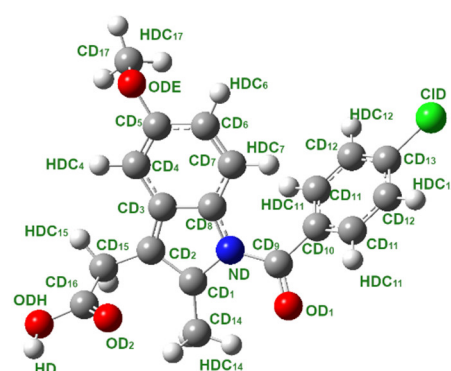

Table S4. Non-bonded force field parameters for naproxen.

| Atom type | $q_i / e$ | $\sigma / \text{\AA}$ | $\epsilon / \text{kcal}\cdot\text{mol}^{-1}$ |
|-----------|-----------|-----------------------|----------------------------------------------|
| CN1       | -0.2292   | 3.550                 | 0.070                                        |
| CN2       | -0.1421   | 3.550                 | 0.070                                        |
| CN3       | 0.1547    | 3.550                 | 0.070                                        |
| CN4       | -0.3135   | 3.550                 | 0.070                                        |
| CN5       | 0.1471    | 3.550                 | 0.070                                        |
| CN6       | -0.4278   | 3.550                 | 0.070                                        |
| CN7       | 0.4590    | 3.550                 | 0.070                                        |
| CN8       | 0.0840    | 3.500                 | 0.080                                        |
| CN9       | -0.1316   | 3.500                 | 0.066                                        |
| CNE       | 0.1884    | 3.800                 | 0.170                                        |
| CNO       | 0.6794    | 3.750                 | 0.105                                        |
| ONE       | -0.3923   | 3.070                 | 0.170                                        |
| ON        | -0.5617   | 2.960                 | 0.210                                        |
| ONH       | -0.6402   | 3.000                 | 0.170                                        |
| HN        | 0.4225    | 0.000                 | 0.000                                        |
| HNC1      | 0.1293    | 2.420                 | 0.030                                        |
| HNC2      | 0.1037    | 2.420                 | 0.030                                        |
| HNC4      | 0.1438    | 2.420                 | 0.030                                        |
| HNC6      | 0.1438    | 2.420                 | 0.030                                        |
| HNC8      | 0.0388    | 2.500                 | 0.030                                        |
| HNC9      | 0.0306    | 2.500                 | 0.030                                        |
| HNE       | 0.0119    | 2.500                 | 0.030                                        |

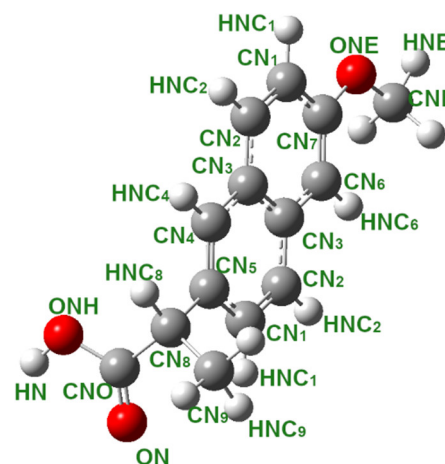

Table S5. Non-bonded force field parameters for adenine.

| Atom type        | $q_i / e$ | $\sigma / \text{\AA}$ | $\epsilon / \text{kcal}\cdot\text{mol}^{-1}$ |
|------------------|-----------|-----------------------|----------------------------------------------|
| NA6 <sub>1</sub> | -0.7206   | 3.250                 | 0.170                                        |
| CA6 <sub>1</sub> | 0.5255    | 3.500                 | 0.080                                        |
| NA6 <sub>2</sub> | -0.7227   | 3.250                 | 0.170                                        |
| CAJ <sub>1</sub> | 0.6052    | 3.500                 | 0.080                                        |
| CAJ <sub>2</sub> | -0.0197   | 3.500                 | 0.080                                        |
| CA6 <sub>2</sub> | 0.6940    | 3.500                 | 0.080                                        |
| NA5 <sub>1</sub> | -0.5550   | 3.250                 | 0.170                                        |

|                  |         |       |       |
|------------------|---------|-------|-------|
| CA5 <sub>1</sub> | 0.3357  | 3.500 | 0.080 |
| NA5 <sub>2</sub> | -0.5215 | 3.250 | 0.170 |
| HA6 <sub>1</sub> | 0.0360  | 2.500 | 0.050 |
| NAH              | -0.8357 | 3.250 | 0.170 |
| HA2 <sub>1</sub> | 0.3808  | 0.000 | 0.000 |
| HA2 <sub>2</sub> | 0.3655  | 0.000 | 0.000 |
| HA5 <sub>1</sub> | 0.0736  | 2.500 | 0.050 |
| HA1              | 0.3589  | 0.000 | 0.000 |

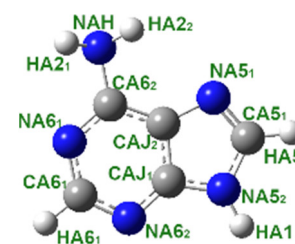

Table S6. Non-bonded force field parameters for cytosine.

| Atom type        | $q_i / e$ | $\sigma / \text{\AA}$ | $\epsilon / \text{kcal}\cdot\text{mol}^{-1}$ |
|------------------|-----------|-----------------------|----------------------------------------------|
| NCH <sub>1</sub> | -0.6154   | 3.250                 | 0.170                                        |
| CCO              | 0.9721    | 3.750                 | 0.105                                        |
| NCC              | -0.8054   | 3.250                 | 0.170                                        |
| CCN              | 0.9886    | 3.500                 | 0.080                                        |
| CCC <sub>1</sub> | -0.6107   | 3.500                 | 0.080                                        |
| CCC <sub>2</sub> | 0.2545    | 3.500                 | 0.080                                        |
| OC               | -0.6338   | 2.960                 | 0.210                                        |
| NCH <sub>2</sub> | -1.0307   | 3.250                 | 0.170                                        |
| HC1              | 0.3432    | 0.000                 | 0.000                                        |
| HC2 <sub>1</sub> | 0.4298    | 0.000                 | 0.000                                        |
| HC2 <sub>2</sub> | 0.4207    | 0.000                 | 0.000                                        |
| HCC <sub>1</sub> | 0.1857    | 2.500                 | 0.050                                        |
| HCC <sub>2</sub> | 0.1014    | 2.500                 | 0.050                                        |

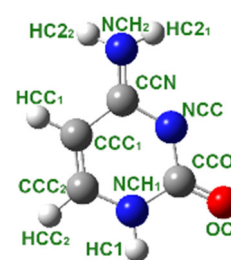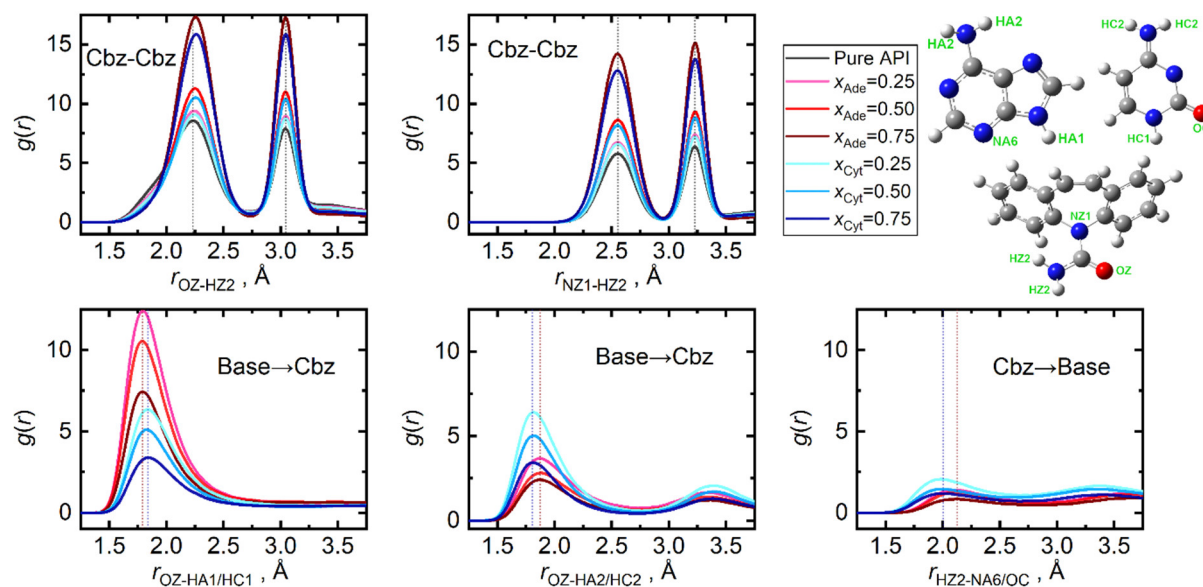

**Figure S1.** Radial distribution functions  $g(r)$  at 410 K illustrating the structure of hydrogen bonding in pure amorphous carbamazepine (upper row) and in its mixtures with adenine or cytosine at various composition. Functions are displayed only for the most important contact sites in the given molecules.

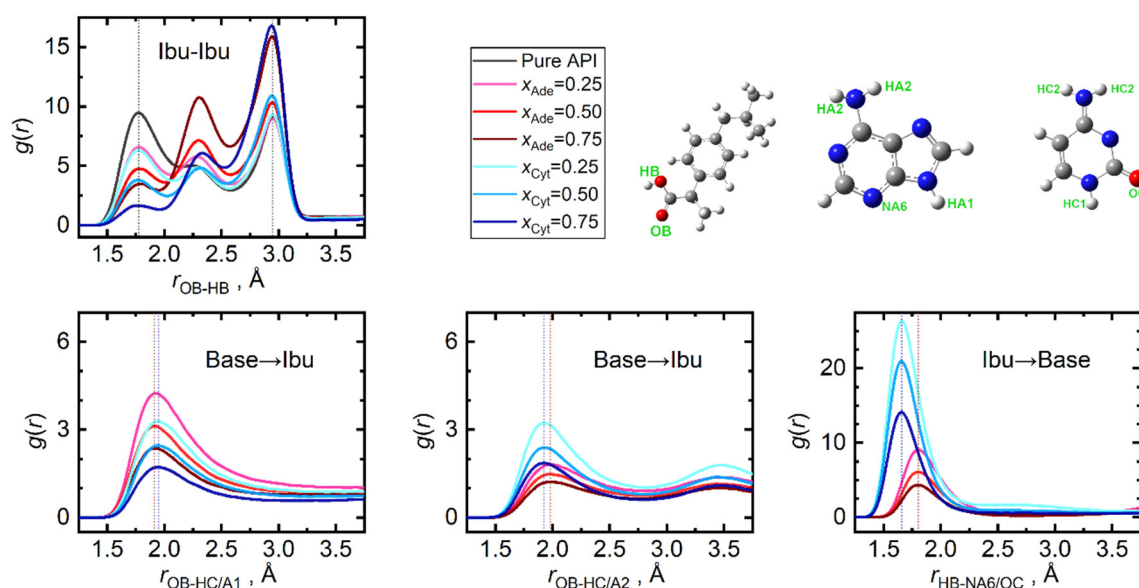

**Figure S2.** Radial distribution functions  $g(r)$  at 410 K illustrating the structure of hydrogen bonding in pure amorphous RS-ibuprofen (upper row) and in its mixtures with adenine or cytosine at various composition. Functions are displayed only for the most important contact sites in the given molecules.

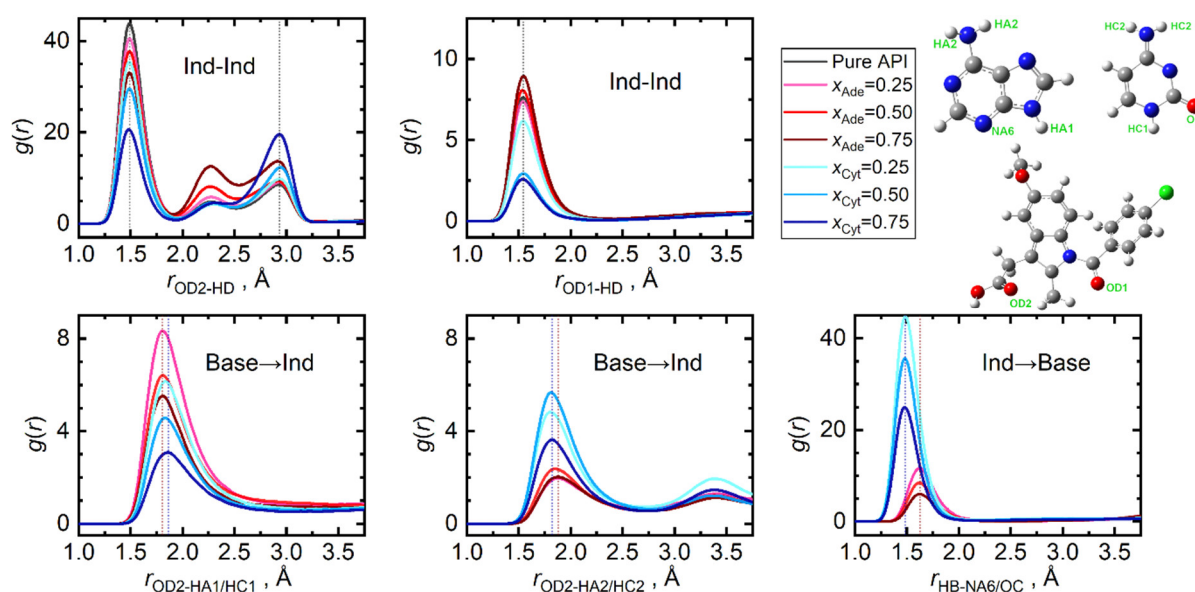

**Figure S3.** Radial distribution functions  $g(r)$  at 410 K illustrating the structure of hydrogen bonding in pure amorphous indomethacin (upper row) and in its mixtures with adenine or cytosine at various composition. Functions are displayed only for the most important contact sites in the given molecules.

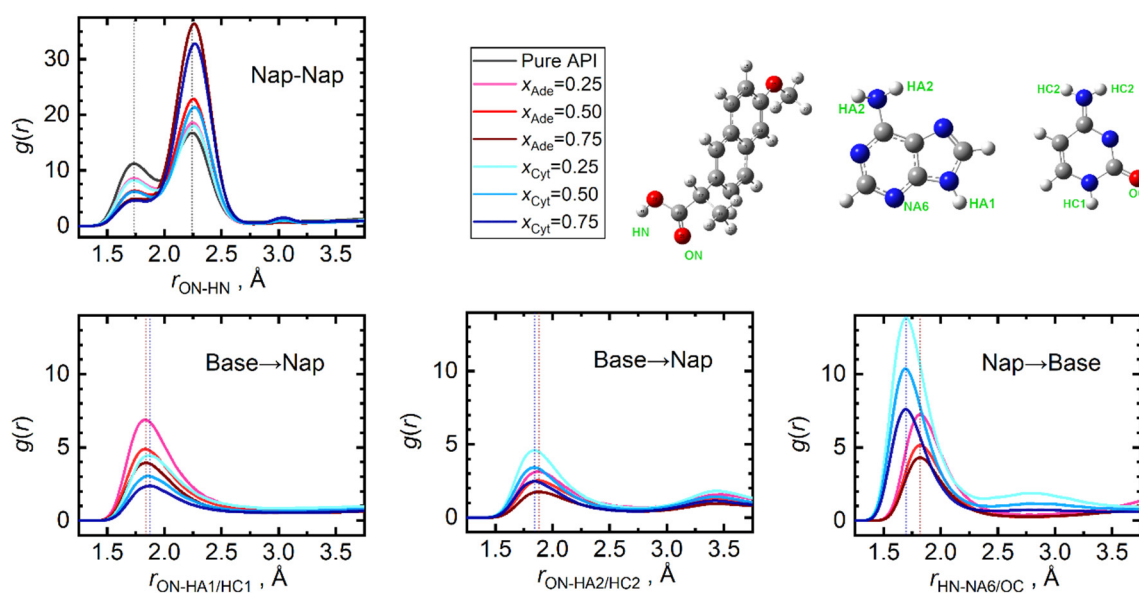

**Figure S4.** Radial distribution functions  $g(r)$  at 410 K illustrating the structure of hydrogen bonding in pure amorphous naproxen (upper row) and in its mixtures with adenine or cytosine at various composition. Functions are displayed only for the most important contact sites in the given molecules.

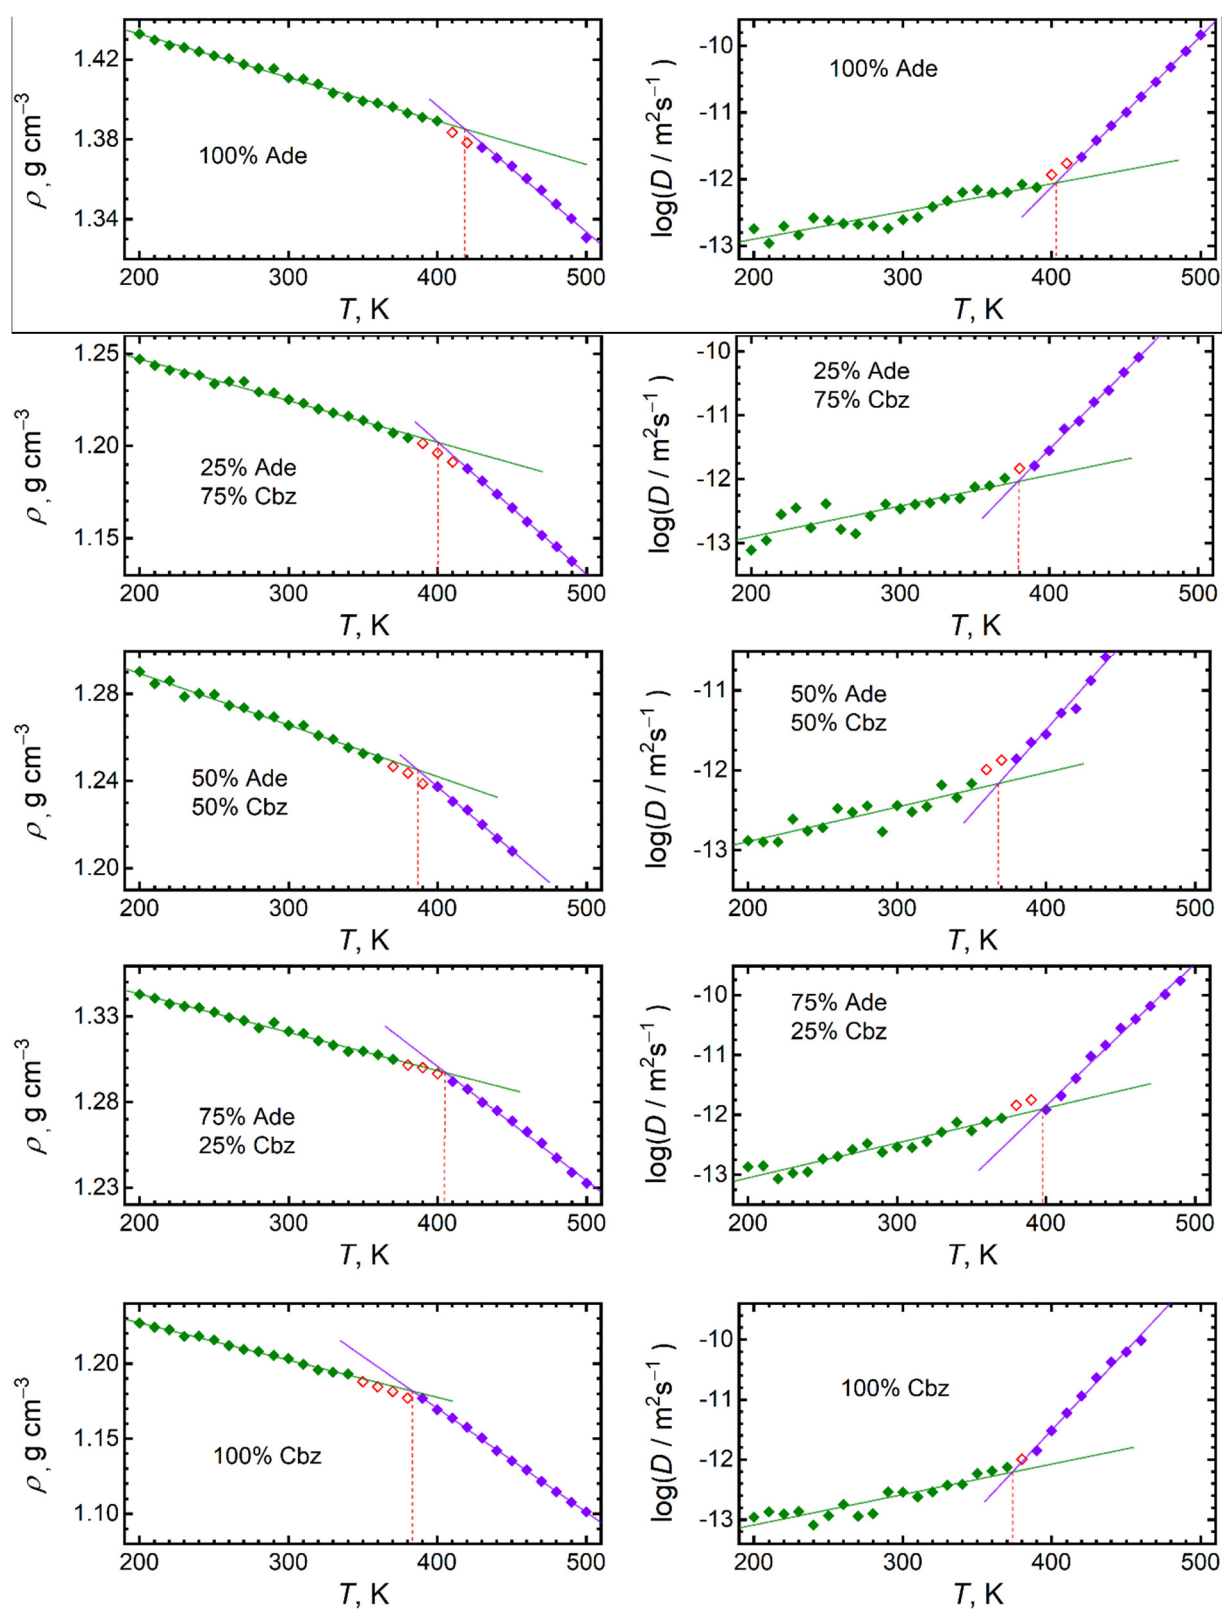

**Figure S5.** Determination of the glass transition temperatures ( $T_g$ ) by the trend shift method for mixtures of adenine, Ade with carbamazepine, Cbz.



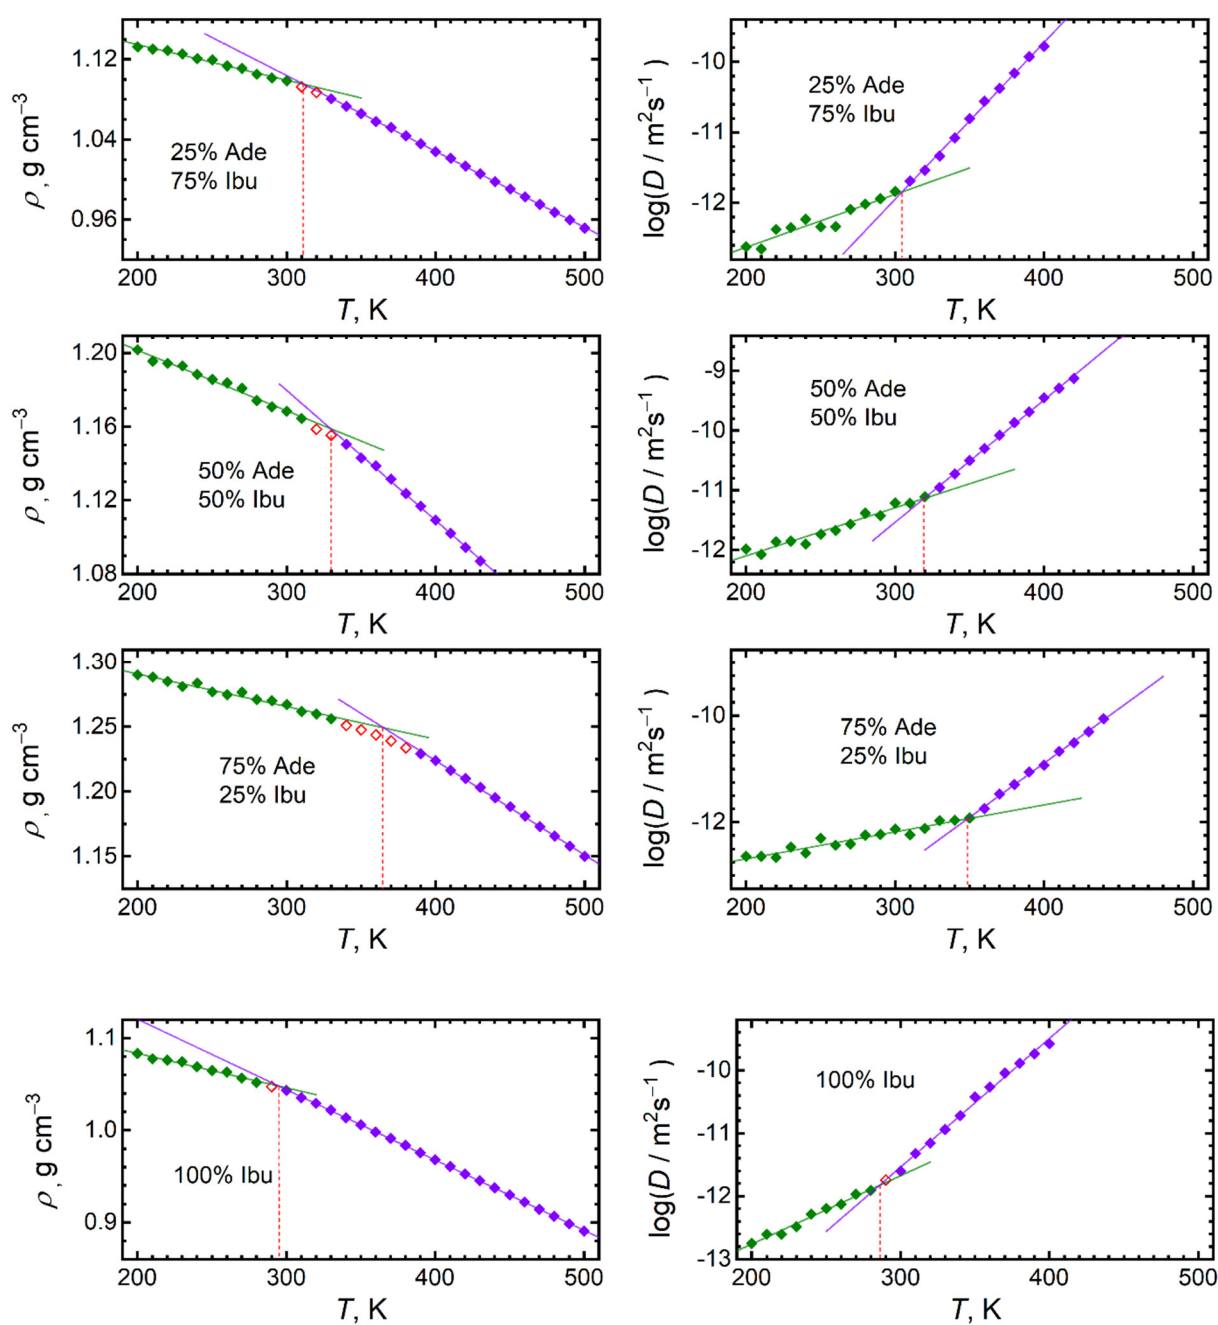

**Figure S6.** Determination of the glass transition temperatures ( $T_g$ ) by the trend shift method for mixtures of adenine, Ade with RS-ibuprofen, Ibu.

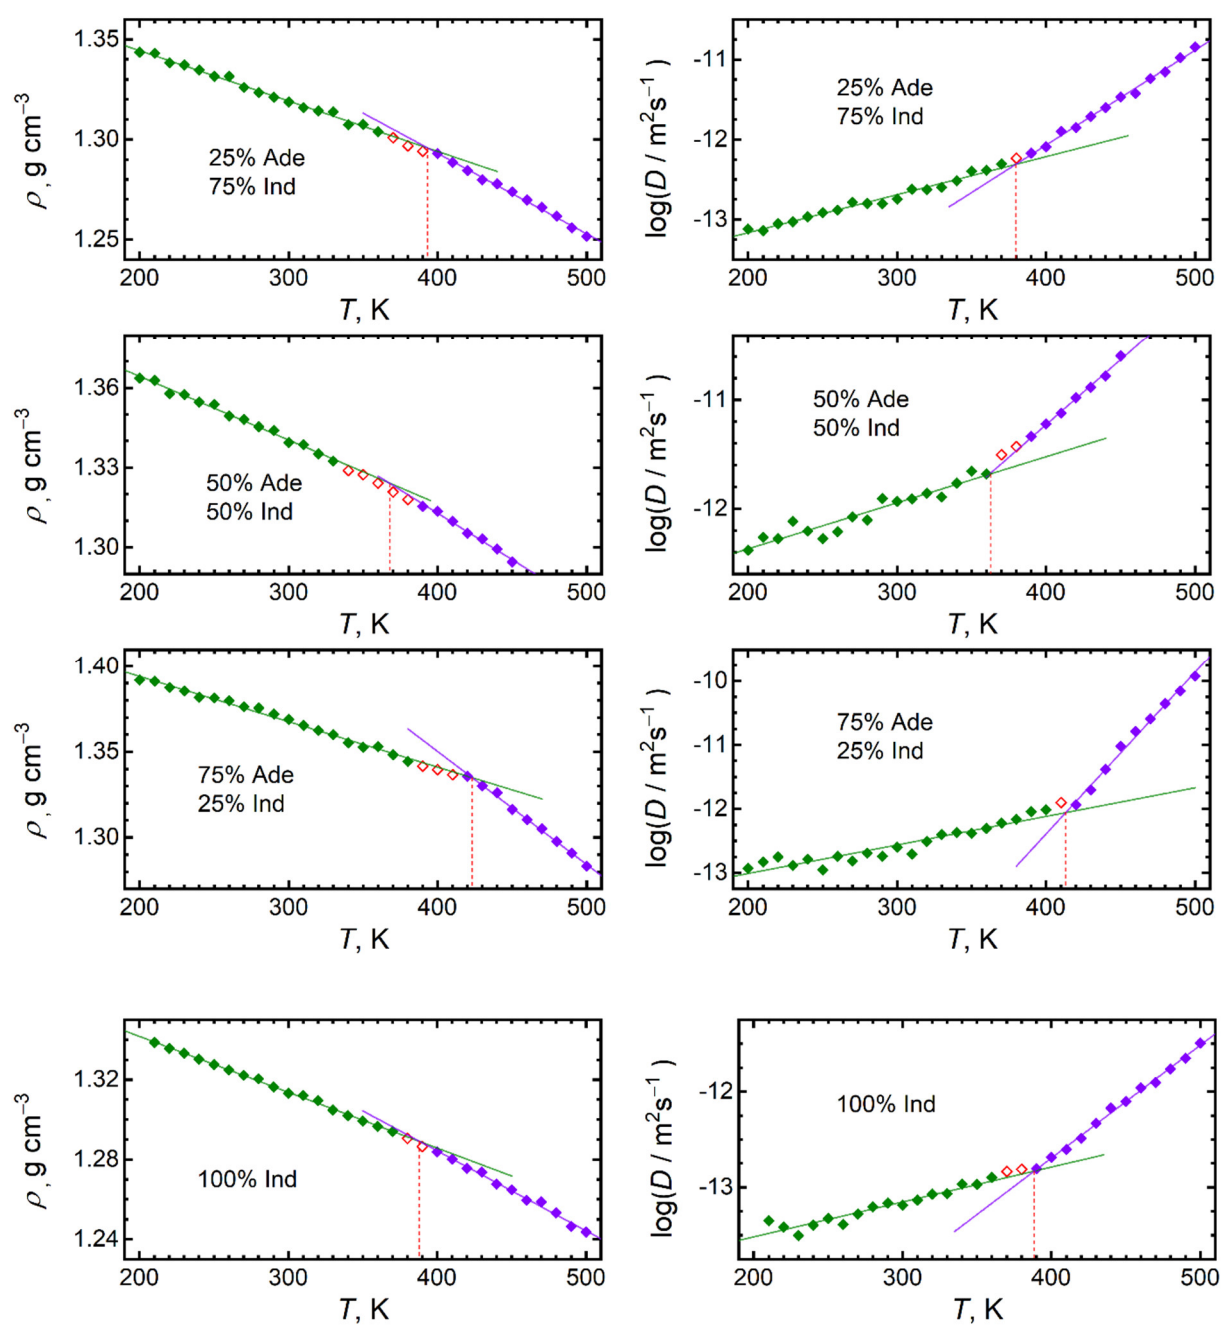

**Figure S7.** Determination of the glass transition temperatures ( $T_g$ ) by the trend shift method for mixtures of adenine, Ade with indomethacin, Ind.



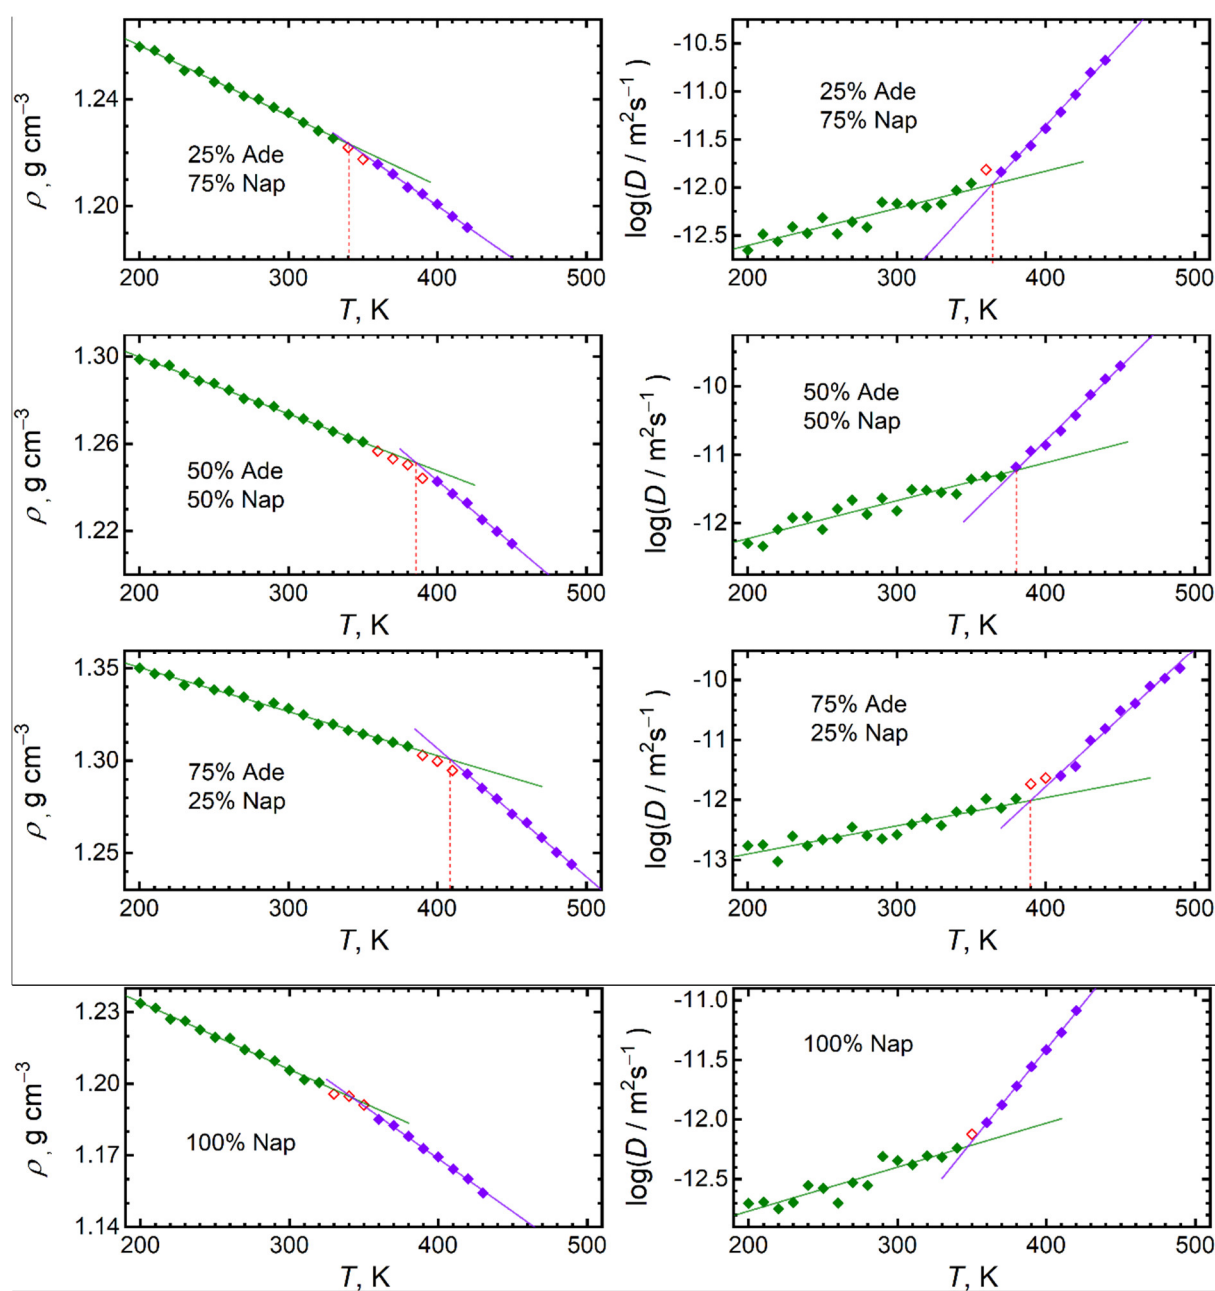

**Figure S8.** Determination of the glass transition temperatures ( $T_g$ ) by the trend shift method for mixtures of adenine, Ade with naproxen, Nap.

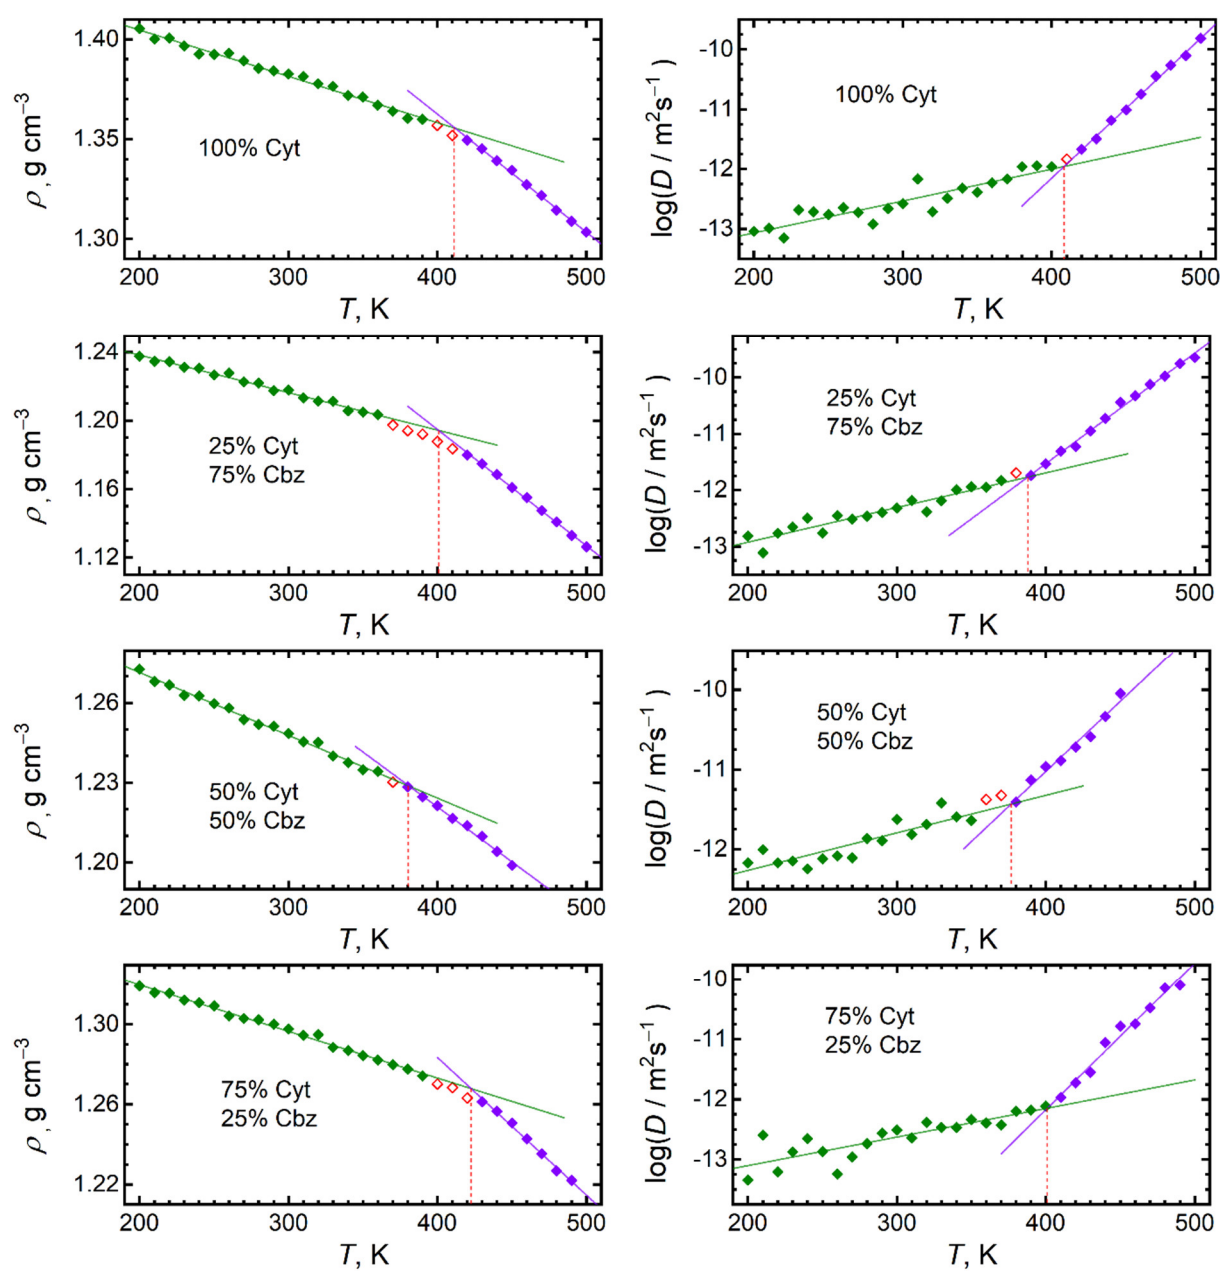

**Figure S9.** Determination of the glass transition temperatures ( $T_g$ ) by the trend shift method for mixtures of cytosine, Cyt with carbamazepin, Cbz.

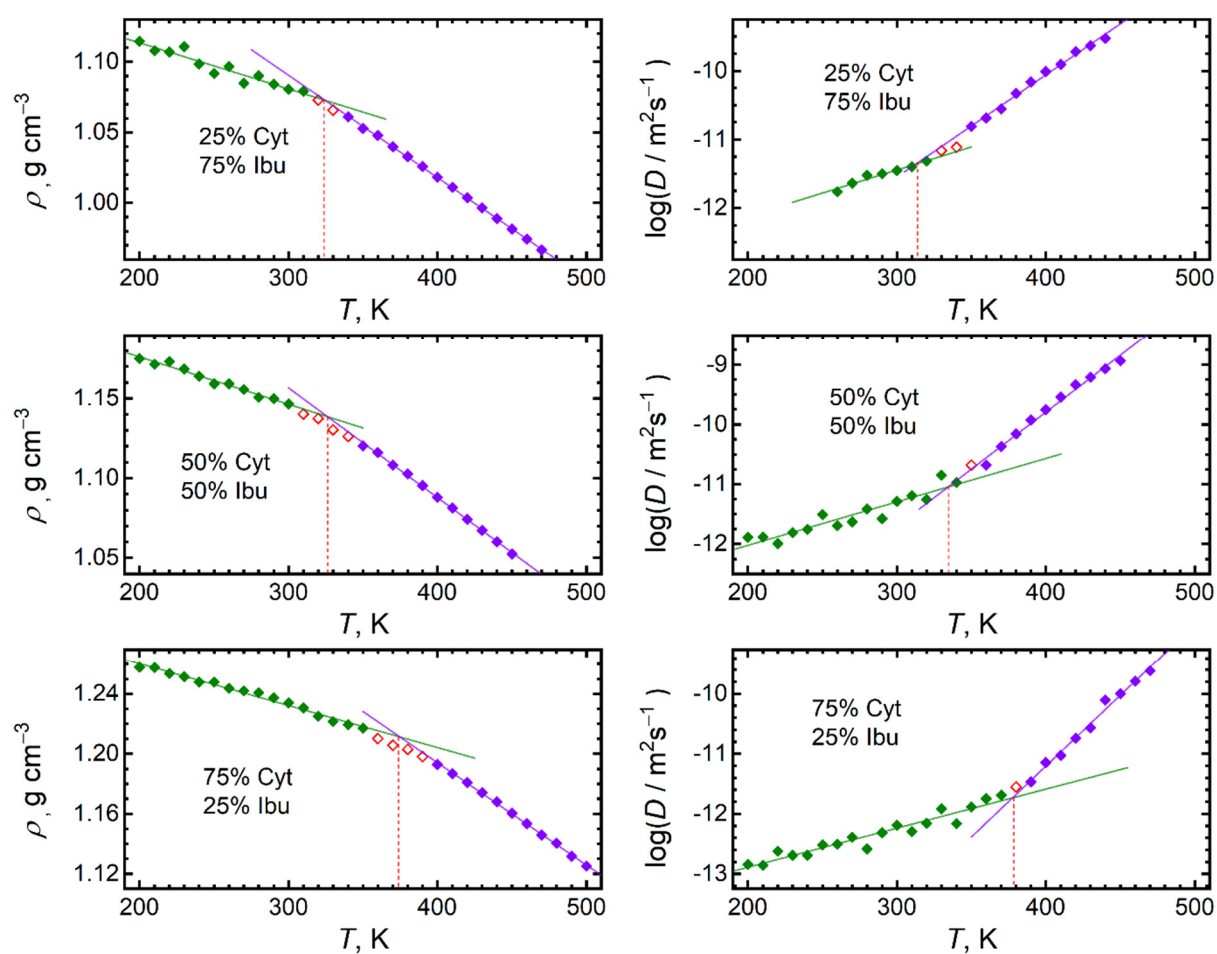

**Figure S10.** Determination of the glass transition temperatures ( $T_g$ ) by the trend shift method for mixtures of cytosine, Cyt with RS-ibuprofen, Ibu.

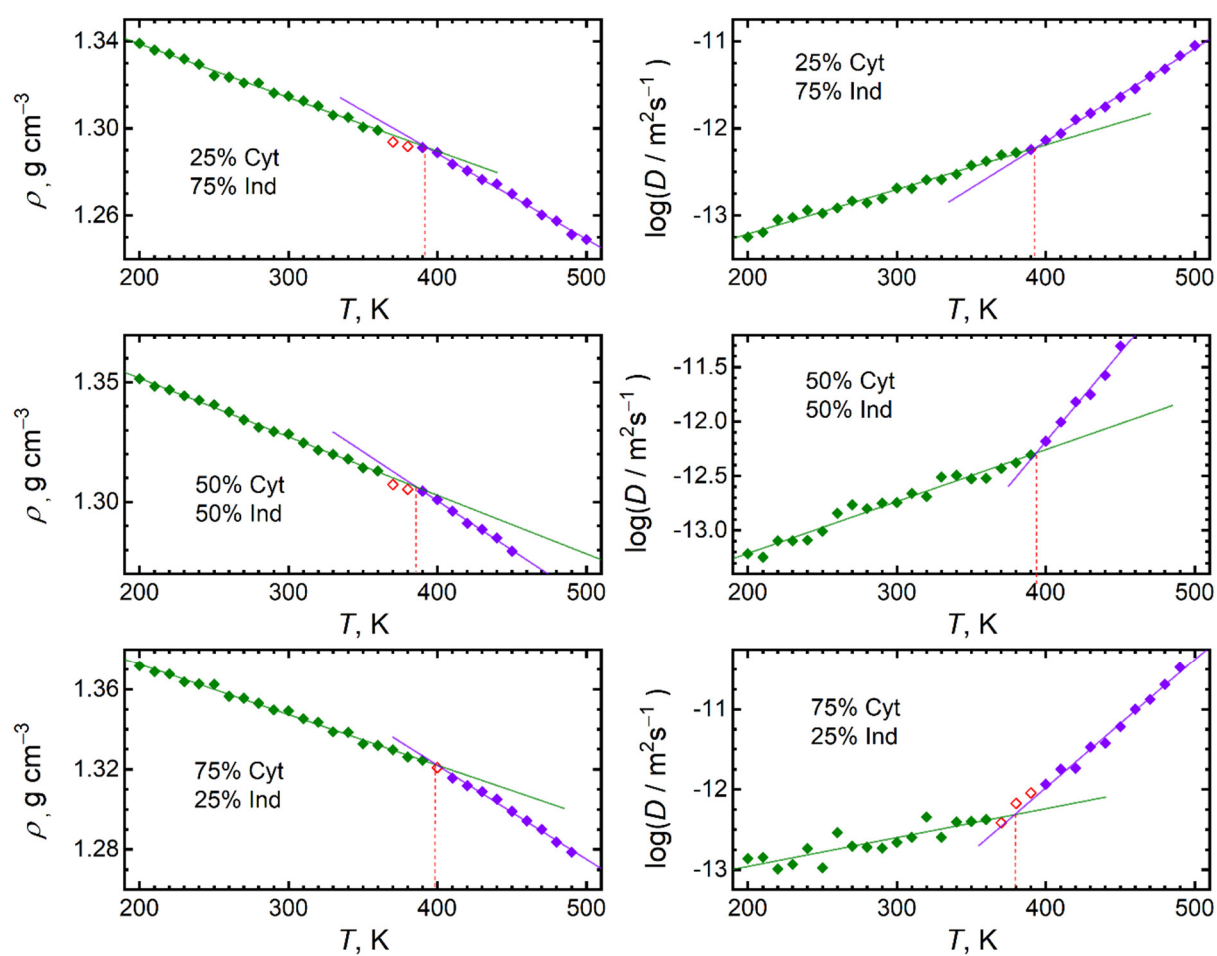

**Figure S11.** Determination of the glass transition temperatures ( $T_g$ ) by the trend shift method for mixtures of cytosine, Cyt with indomethacin, Ind.

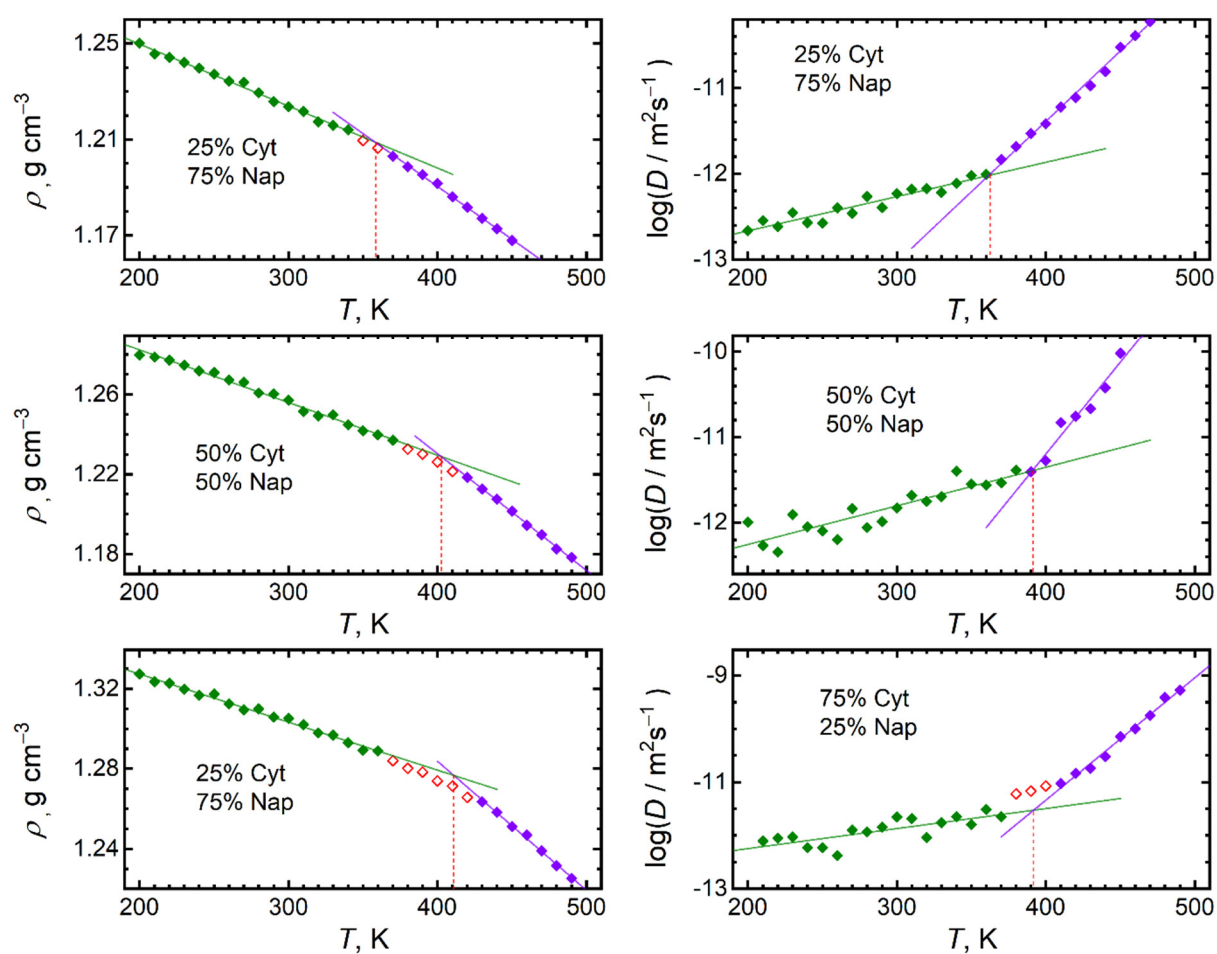

**Figure S12.** Determination of the glass transition temperatures ( $T_g$ ) by the trend shift method for mixtures of cytosine, Cyt with naproxen, Nap.
